# Supplementary material for: Gas phase low energy electron induced decomposition of the focused electron beam induced deposition (FEBID) precursor trimethyl (methylcyclopentadienyl) platinum(iv) (MeCpPtMe3)
Source: Royal Society of Chemistry journal article supplement (doi:10.1039/c2cp42637d), 2012-01-01
Supplement: c2cp42637d.pdf [file c2cp42637d.pdf]

## Supporting Information

# Low Energy Electron Induced Decomposition of Gas Phase Trimethyl (Methylcyclopentadienyl) Platinum(IV) -a precursor for Focused Electron Beam Induced Deposition (FEBID)

Sarah Engmann<sup>a</sup>, Michal Stano<sup>b</sup>, Štefan Matejčík<sup>\*b</sup>, and Oddur Ingólfsson<sup>\*a</sup>

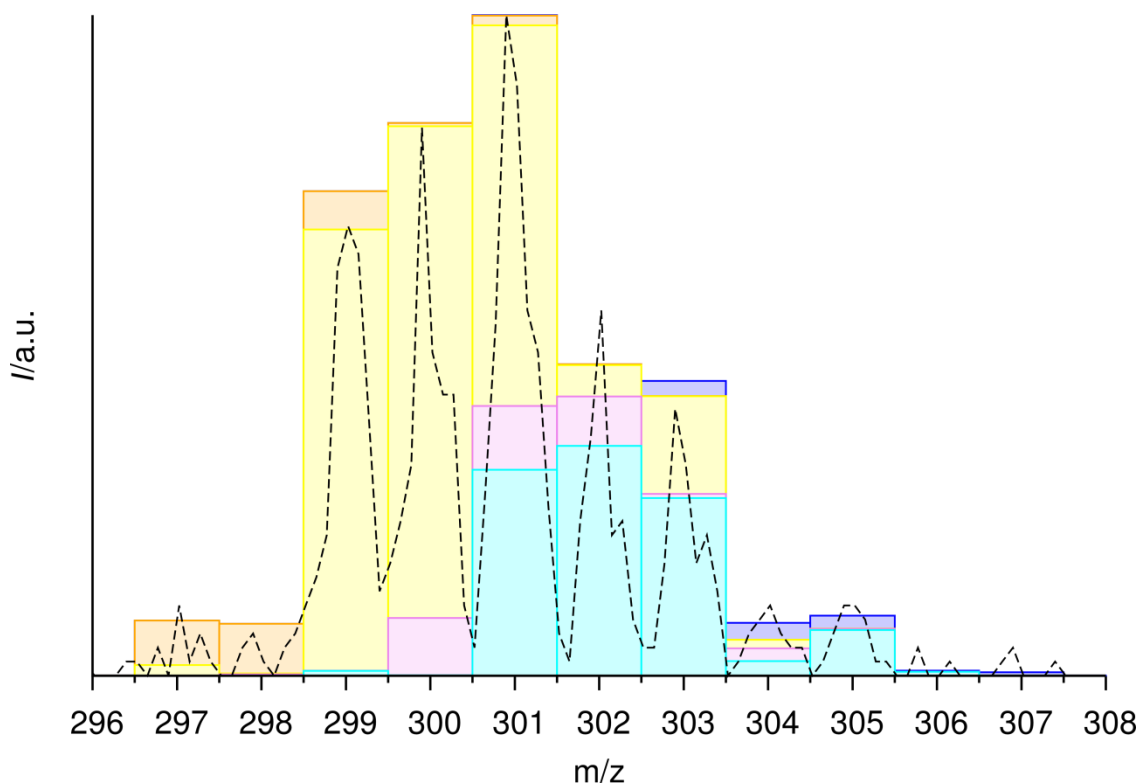

Fig. S1 Example of deconvoluted mass peaks due to overlapping Pt isotope contributions with different numbers of hydrogen atoms;  $C_8H_9Pt$  (m/z 300, 58%, yellow),  $C_8H_{11}Pt$  (m/z main peak 302, 27%, cyan),  $C_8H_{10}Pt$  (m/z 301, 7%, purple),  $C_8H_7Pt$  (m/z 298, 6%, orange) and  $C_8H_{13}Pt$  (m/z 304, 2% blue). For clarity the experimental mass spectrum is displayed as dashed line (not to scale). The error is estimated as the difference between the relative area of the integrated experimental peaks and the simulated peaks, and is for the more intense peaks less than 10%. Mass peaks with lower intensity are subject to a lower signal/noise ratio and thus relative errors are somewhat larger for those. As the contribution to the fitted total signal is proportional to the peak intensity, the error contributions from the low intensity peaks weigh less than the contributions from the main peaks and the overall accuracy of this procedure is estimated to be about  $\pm 5\%$ .

Table S1 Overview of contributing fragments to observed mass peaks due to overlapping Pt isotope contributions with different numbers of hydrogen.

| Peak group | Contributing fragments            | m/z | Contribution/% |
|------------|-----------------------------------|-----|----------------|
| 301        | C <sub>8</sub> H <sub>13</sub> Pt | 304 | 2              |
|            | C <sub>8</sub> H <sub>11</sub> Pt | 302 | 27             |
|            | C <sub>8</sub> H <sub>10</sub> Pt | 301 | 7              |
|            | C <sub>8</sub> H <sub>9</sub> Pt  | 300 | 58             |
|            | C <sub>8</sub> H <sub>7</sub> Pt  | 298 | 6              |
| 288        | C <sub>7</sub> H <sub>10</sub> Pt | 289 | 30             |
|            | C <sub>7</sub> H <sub>9</sub> Pt  | 288 | 50             |
|            | C <sub>7</sub> H <sub>7</sub> Pt  | 286 | 10             |
|            | C <sub>7</sub> H <sub>6</sub> Pt  | 285 | 6              |
|            | C <sub>7</sub> H <sub>5</sub> Pt  | 284 | 4              |
| 272        | C <sub>6</sub> H <sub>7</sub> Pt  | 274 | 8              |
|            | C <sub>6</sub> H <sub>6</sub> Pt  | 273 | 40             |
|            | C <sub>6</sub> H <sub>5</sub> Pt  | 272 | 31             |
|            | C <sub>6</sub> H <sub>4</sub> Pt  | 271 | 15             |
|            | C <sub>6</sub> H <sub>3</sub> Pt  | 270 | 6              |
| 245        | C <sub>4</sub> H <sub>4</sub> Pt  | 247 | 13             |
|            | C <sub>4</sub> H <sub>3</sub> Pt  | 246 | 47             |
|            | C <sub>4</sub> H <sub>2</sub> Pt  | 245 | 25             |
|            | C <sub>4</sub> HPt                | 244 | 15             |
| 233        | C <sub>3</sub> H <sub>6</sub> Pt  | 237 | 3              |
|            | C <sub>3</sub> H <sub>5</sub> Pt  | 236 | 3              |
|            | C <sub>3</sub> H <sub>3</sub> Pt  | 234 | 39             |
|            | C <sub>3</sub> H <sub>2</sub> Pt  | 233 | 33             |
|            | C <sub>3</sub> HPt                | 232 | 22             |
| 221        | C <sub>2</sub> H <sub>5</sub> Pt  | 224 | 24             |
|            | C <sub>2</sub> H <sub>3</sub> Pt  | 222 | 46             |
|            | C <sub>2</sub> H <sub>2</sub> Pt  | 221 | 25             |
|            | C <sub>2</sub> HPt                | 220 | 5              |
| 209        | CH <sub>3</sub> Pt                | 210 | 17             |
|            | CH <sub>2</sub> Pt                | 209 | 44             |
|            | CHPt                              | 208 | 31             |
|            | CPt                               | 207 | 8              |
